# Supplementary figures and images for: Quantifying the Academic Quality of Children’s Videos Using Machine Comprehension
Source: Atypon-hosted journal article supplement (doi:10.1287/ijoc.2023.0502), 2025-10-03

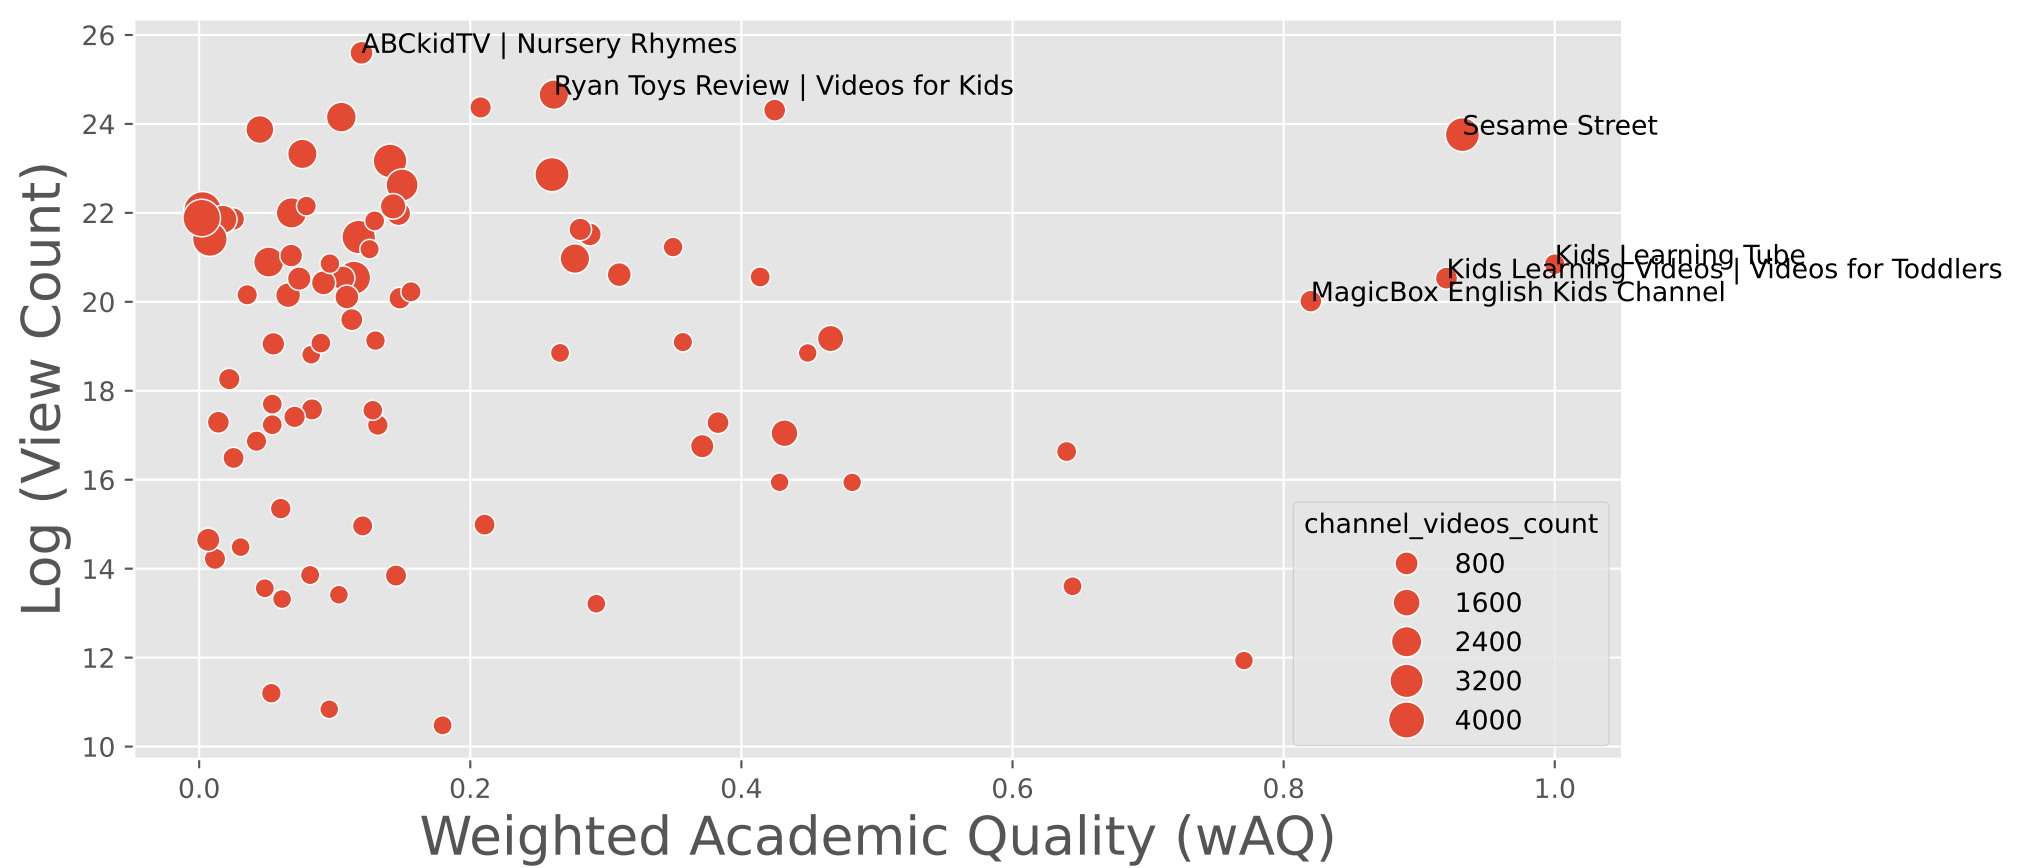

Supplement: ijoc.2023.0502.cd.zip [file edu_vid_quan_v5.pdf › 2023.0502-main/results/figures/edu_vid_quan_v5.pdf]

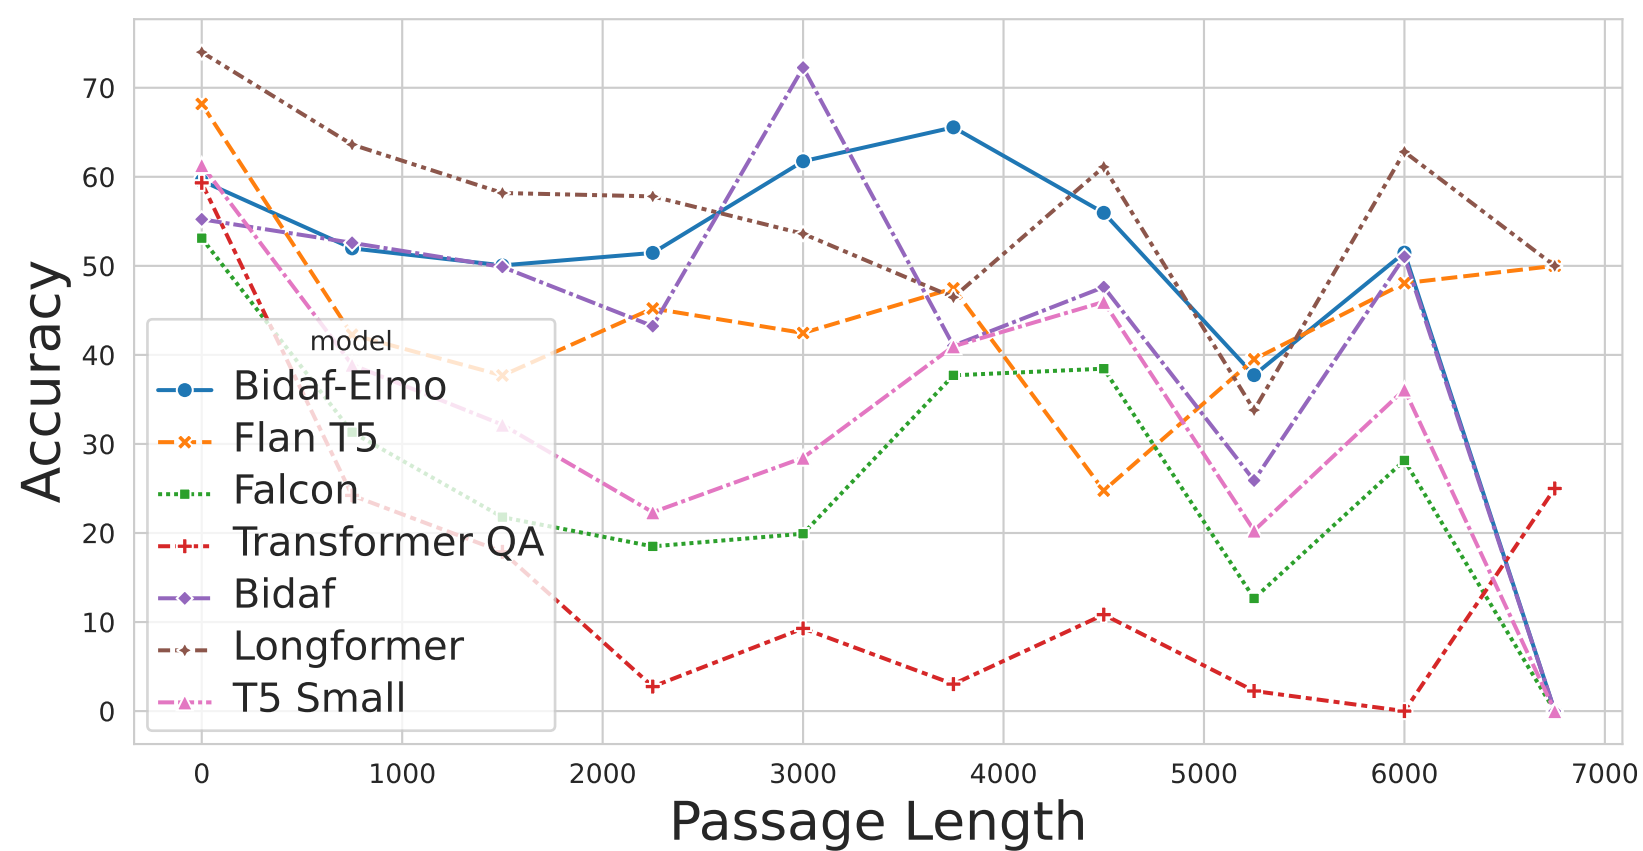

Supplement: ijoc.2023.0502.cd.zip [file passage_length-4.pdf › 2023.0502-main/results/figures/passage_length-4.pdf]

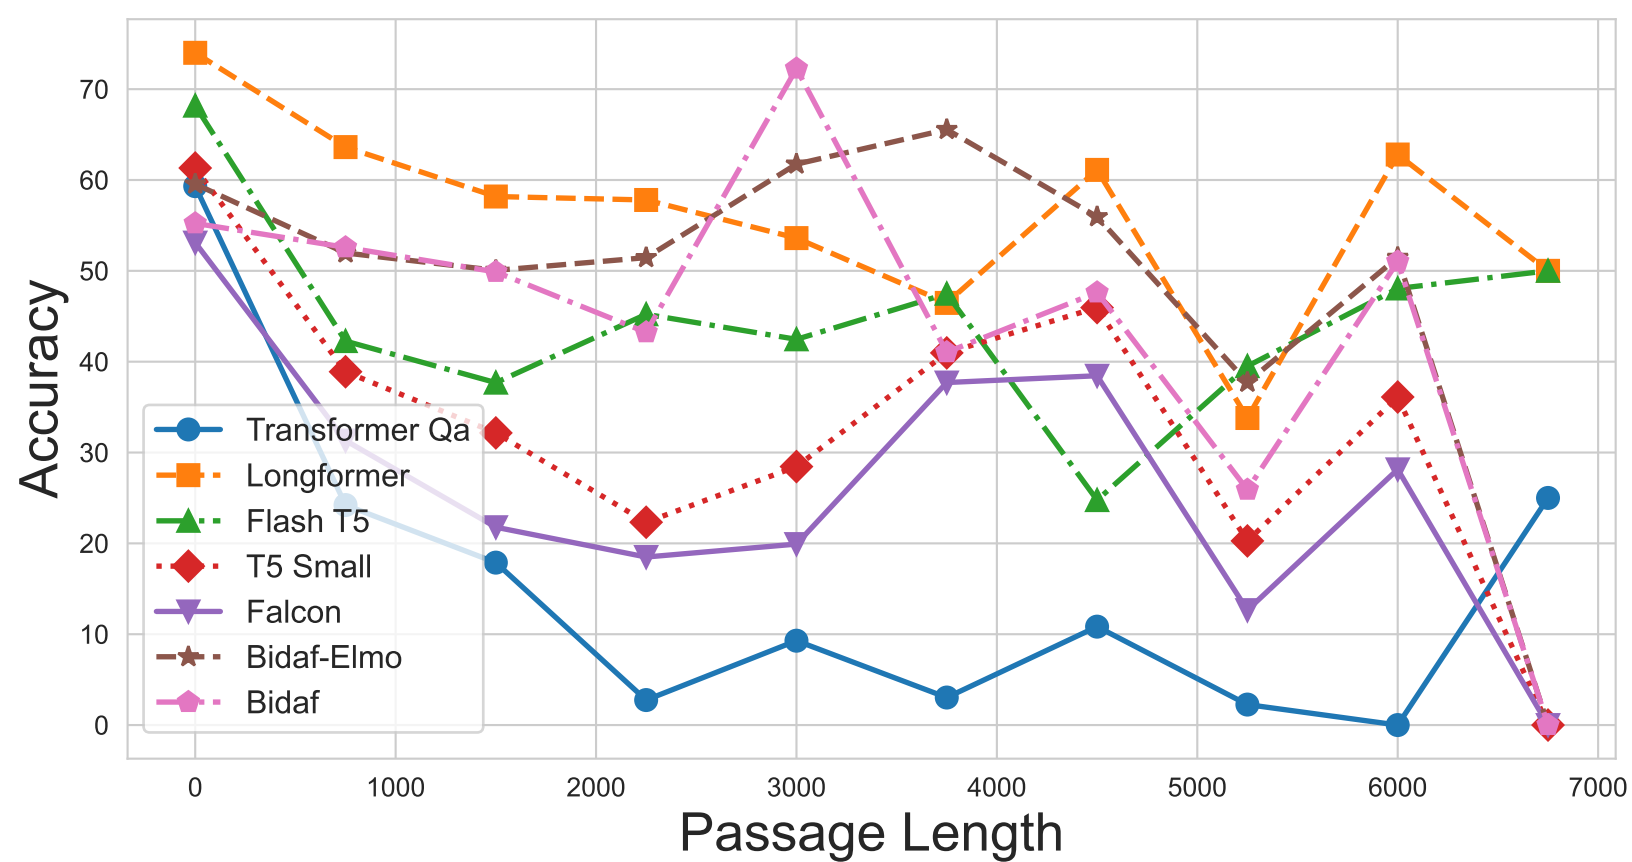

Supplement: ijoc.2023.0502.cd.zip [file passage_length.pdf › 2023.0502-main/results/figures/passage_length.pdf]

Lesson Category

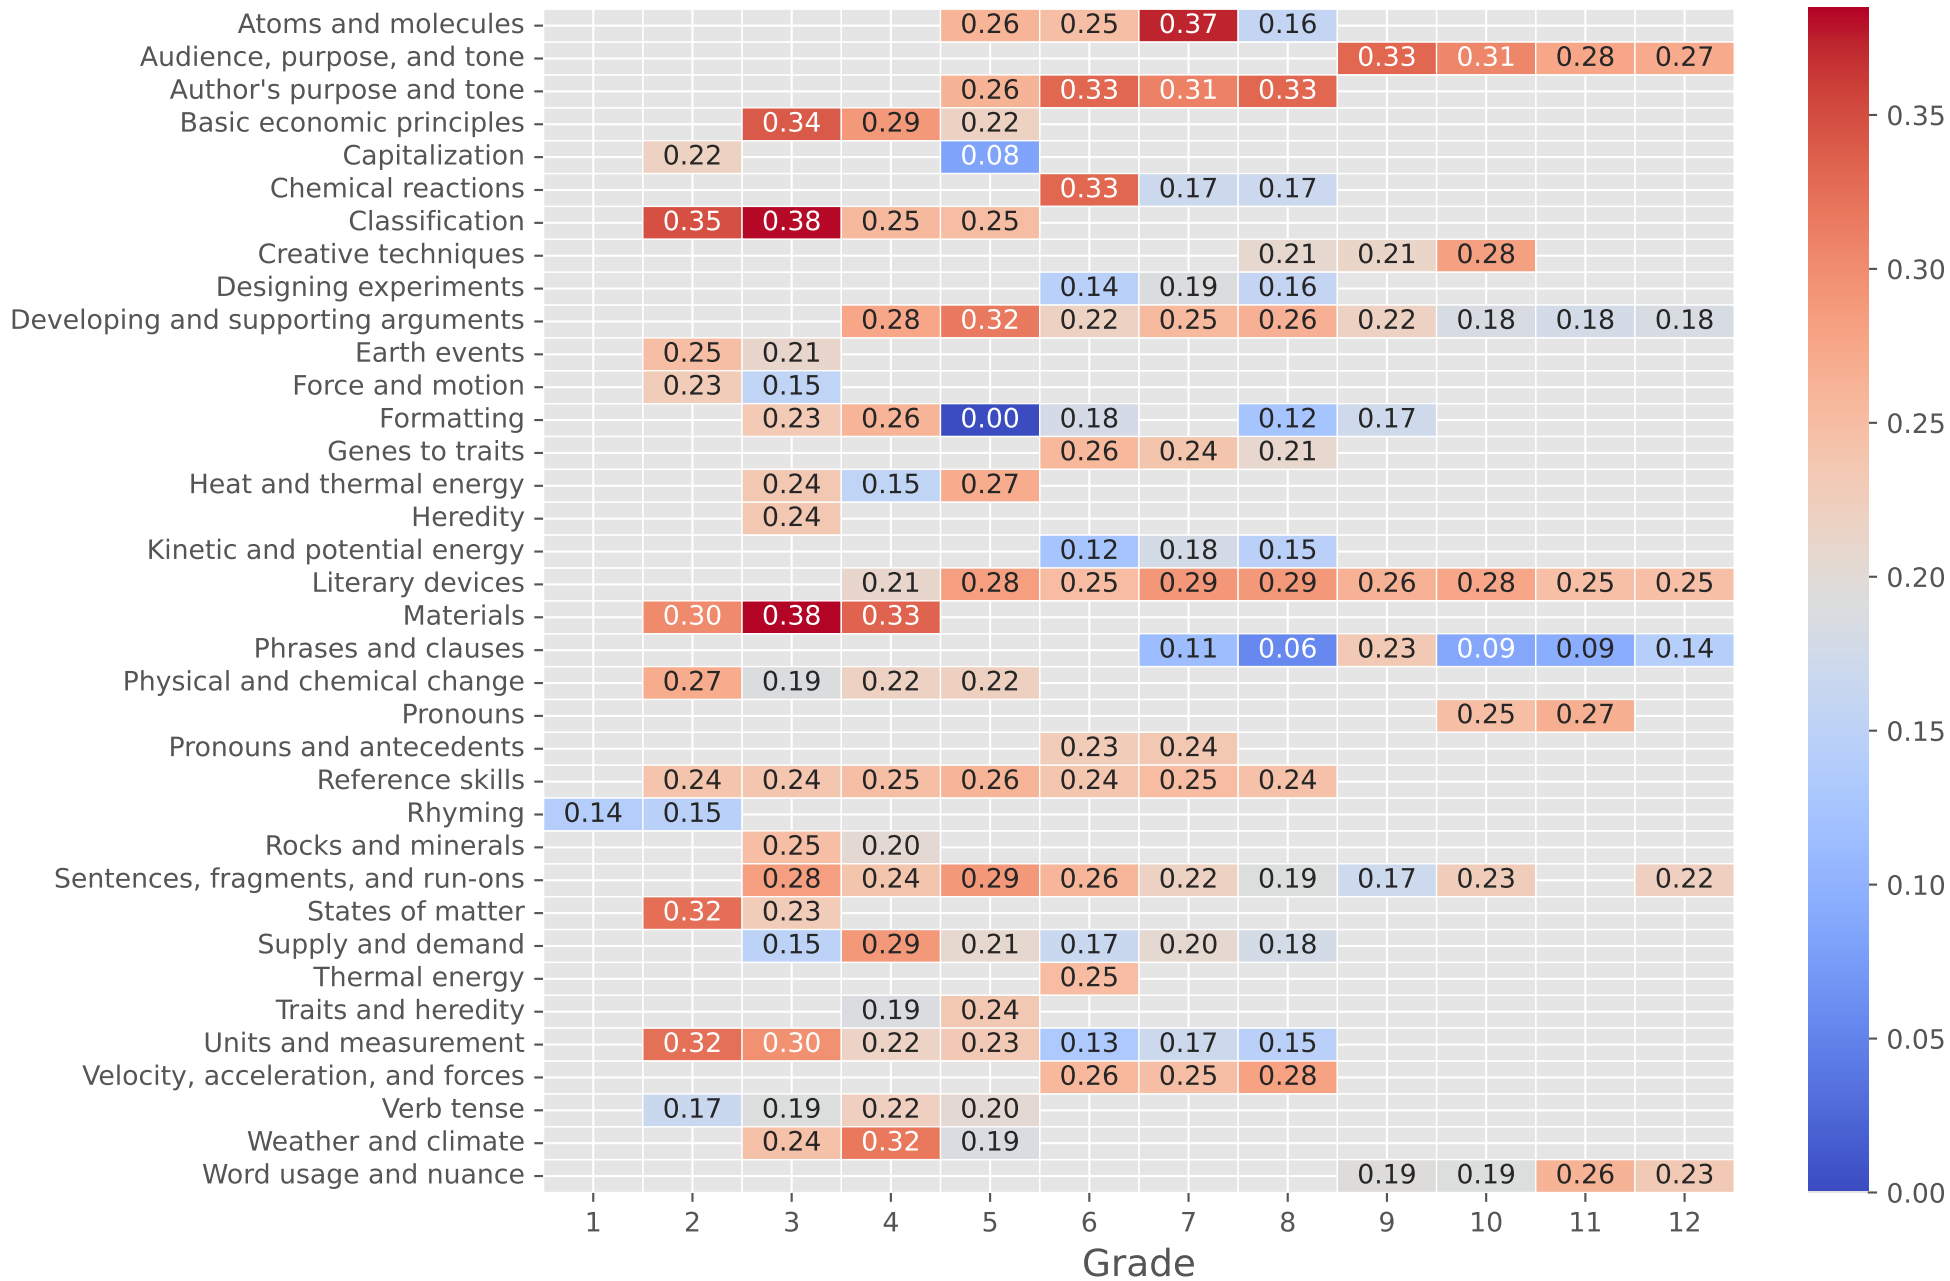

Supplement: ijoc.2023.0502.cd.zip [file subject_grade_heatmap_1_correct_top_v2.pdf › 2023.0502-main/results/figures/subject_grade_heatmap_1_correct_top_v2.pdf]
